# Supplementary material
Source: ML conference proceedings conference paper supplement (https://proceedings.mlr.press/v54/bewsher17a.html)
Supplement: Supplementary file [file bewsher17a-supp.pdf]

## Supplementary Material

### Density of $Y = \sqrt{1 + X^2}$

Cumulative distribution of  $Y$ :

$$P(Y < y) = P(|X - \mu| < \sqrt{y^2 - 1}) \quad (61)$$

$$= P(-\sqrt{y^2 - 1} < X - \mu < \sqrt{y^2 - 1}) \quad (62)$$

$$= P(-\sqrt{y^2 - 1} + \mu < X < \sqrt{y^2 - 1} + \mu) \quad (63)$$

$$= F_X(\sqrt{y^2 - 1} + \mu) - (1 - F_X(\sqrt{y^2 - 1} - \mu)). \quad (64)$$

Probability density of  $Y$ :

$$p_Y(y) = \frac{d}{dy} P(Y < y) \quad (65)$$

$$= \frac{d}{dy} \left[ F_X(\sqrt{y^2 - 1} + \mu) - (1 - F_X(\sqrt{y^2 - 1} - \mu)) \right] \quad (66)$$

$$= \frac{1}{\sqrt{2\pi}\sigma} \left[ \exp\left(-\frac{(\sqrt{y^2 - 1} + \mu)^2}{2\sigma^2}\right) + \exp\left(-\frac{(\sqrt{y^2 - 1} - \mu)^2}{2\sigma^2}\right) \right] \frac{y}{\sqrt{y^2 - 1}}.$$

Mean of  $Y$ :

$$\mathbb{E}_{p_Y(y)}[y] = \int_1^\infty y p_Y(y) dy \quad (67)$$

$$= \frac{1}{\sqrt{2\pi}\sigma} \int_1^\infty \left[ \exp\left(-\frac{(\sqrt{y^2 - 1} + \mu)^2}{2\sigma^2}\right) + \exp\left(-\frac{(\sqrt{y^2 - 1} - \mu)^2}{2\sigma^2}\right) \right] y^2 (y^2 - 1)^{-\frac{1}{2}} dy. \quad (68)$$

At first glance this looks to be an intractable integral, however, with the change of variables  $y = (x^2 + 1)^{1/2}$  and by expanding the exponential cross terms we arrive at:

$$\mathbb{E}[y] = \frac{1}{\sqrt{2\pi}\sigma} \exp\left(-\frac{\mu^2}{2\sigma^2}\right) \sum_{l=0}^{\infty} \frac{\Gamma(l + \frac{1}{2})}{(2l)!} \left(\frac{\mu}{\sigma^2}\right)^{2l} U\left(l + \frac{1}{2}, l + 2, \frac{1}{2\sigma^2}\right). \quad (69)$$
